# Supplementary material for: Viral-mediated Pou5f1 (Oct4) overexpression and inhibition of Notch signaling synergistically induce neurogenic competence in mammalian Müller glia
Source: eLife. 2025 May 19;14:RP106450. doi: 10.7554/eLife.106450 (PMC12088672; doi:10.7554/eLife.106450)
Supplement: Supplementary file 1. — Raw + adjusted p-values, relative fold-change, and the fraction of all profiled cells expressing the gene in question is shown for both Muller glia and Muller glia-derived progenitor cells transfected with AAV-GFAP-Pou5f1-mCherry vs. AAV-GFAP-mCherry. [file elife-106450-supp1.xls]

## Sheet: DEGs in MG
Genes	p_val	avg_log2FC	mCherry	Oct_4	p_val_adj	Sample
mCherryCW3SL	0	3.66904	0.573	0.178	0	mCherry
Gm8730	0	1.06092	0.704	0.411	0	mCherry
Eno1b	0	1.01935	0.599	0.362	0	mCherry
Camk1d	0	1.11112	0.747	0.537	0	mCherry
Pmepa1	0	1.45159	0.748	0.588	0	mCherry
Folh1	0	0.994885	0.803	0.645	0	mCherry
Gm10709	0	4.46422	0.167	0.01	0	mCherry
Acsl3	0	0.502803	0.997	0.992	0	mCherry
Ptn	0	0.56193	0.97	0.97	0	mCherry
Dkk3	0	0.563025	0.992	0.992	0	mCherry
Sorcs1	1.7884e-307	0.652645	0.979	0.94	5.00751e-303	mCherry
Kcnk1	9.68943e-301	0.842112	0.713	0.51	2.71304e-296	mCherry
Pak3	5.53764e-287	0.551486	0.979	0.959	1.55054e-282	mCherry
Gm5900	3.1366e-284	1.73332	0.338	0.143	8.78249e-280	mCherry
Abca8a	3.81897e-271	0.96894	0.883	0.837	1.06931e-266	mCherry
Pde10a	1.02004e-245	1.71576	0.425	0.234	2.85612e-241	mCherry
Abca8b	2.22913e-228	1.18964	0.632	0.482	6.24156e-224	mCherry
Elmod1	1.58011e-216	0.506309	0.88	0.795	4.42432e-212	mCherry
Cacng4	2.74912e-196	0.678605	0.733	0.591	7.69753e-192	mCherry
Enpp2	1.52948e-192	0.716738	0.763	0.641	4.28254e-188	mCherry
Lars2	1.31071e-184	0.730352	0.767	0.654	3.67e-180	mCherry
Gphn	3.21486e-175	0.575356	0.901	0.849	9.00161e-171	mCherry
Col23a1	5.79548e-174	0.623201	0.874	0.822	1.62273e-169	mCherry
Rims1	4.58508e-173	0.720838	0.733	0.614	1.28382e-168	mCherry
Reck	5.09842e-171	0.732588	0.697	0.564	1.42756e-166	mCherry
Cadm1	1.67532e-168	0.507796	0.963	0.948	4.6909e-164	mCherry
Sorl1	4.81447e-164	0.631564	0.781	0.688	1.34805e-159	mCherry
Adam23	8.69066e-163	0.597055	0.887	0.818	2.43338e-158	mCherry
Met	1.36816e-152	1.34195	0.311	0.169	3.83084e-148	mCherry
Cav1	1.0702e-150	0.685461	0.742	0.665	2.99655e-146	mCherry
Dlgap1	1.41361e-148	0.810579	0.589	0.448	3.9581e-144	mCherry
Hexb	8.10633e-142	0.690198	0.616	0.488	2.26977e-137	mCherry
Rora	1.18724e-139	0.50461	0.987	0.974	3.32428e-135	mCherry
Prss56	4.15072e-137	2.05933	0.281	0.148	1.1622e-132	mCherry
Slc6a11	1.36177e-136	0.585773	0.75	0.669	3.81296e-132	mCherry
Rgs6	1.79473e-133	0.556511	0.937	0.912	5.02525e-129	mCherry
Gm10093	7.99297e-132	2.53006	0.101	0.021	2.23803e-127	mCherry
Cdk8	1.44585e-130	0.558489	0.771	0.68	4.04837e-126	mCherry
Cd24a	9.66881e-129	2.02781	0.129	0.037	2.70727e-124	mCherry
Unc5c	1.67846e-127	0.596534	0.847	0.795	4.69969e-123	mCherry
Tanc2	1.56153e-123	0.623432	0.742	0.644	4.37228e-119	mCherry
Hes5	1.87414e-120	1.19595	0.261	0.137	5.24758e-116	mCherry
Trhde	1.14348e-113	0.710131	0.626	0.496	3.20174e-109	mCherry
Cxadr	2.21444e-113	0.751874	0.481	0.35	6.20044e-109	mCherry
Utp14b	9.28237e-113	0.5501	0.755	0.677	2.59906e-108	mCherry
Arhgap6	2.38822e-112	0.830839	0.524	0.398	6.68703e-108	mCherry
Foxp2	3.68458e-110	1.38938	0.239	0.124	1.03168e-105	mCherry
Stat1	4.04377e-106	1.10419	0.444	0.332	1.13226e-101	mCherry
Fgf13	3.7788e-105	0.520079	0.844	0.789	1.05806e-100	mCherry
Oaf	3.92995e-104	0.750999	0.493	0.379	1.10039e-99	mCherry
Crispld1	1.29825e-102	1.97157	0.118	0.039	3.63509e-98	mCherry
Far1	6.49247e-102	0.662837	0.577	0.467	1.81789e-97	mCherry
Dhcr24	1.76271e-100	0.945696	0.343	0.222	4.9356e-96	mCherry
Slitrk2	1.84304e-99	0.570566	0.694	0.608	5.16051e-95	mCherry
Cav2	2.30213e-96	0.528396	0.701	0.645	6.44596e-92	mCherry
Slc1a2	2.04693e-95	0.561871	0.645	0.561	5.7314e-91	mCherry
Gpr153	4.5012e-95	0.888055	0.344	0.227	1.26034e-90	mCherry
Trim9	1.61555e-91	0.808192	0.446	0.334	4.52354e-87	mCherry
Egfr	7.92309e-91	0.673902	0.567	0.465	2.21846e-86	mCherry
Cox4i2	1.9622e-90	0.594255	0.797	0.803	5.49416e-86	mCherry
Qpct	4.65612e-85	1.3184	0.199	0.107	1.30371e-80	mCherry
Sntg1	5.86583e-85	1.15968	0.25	0.148	1.64243e-80	mCherry
Camk2d	1.63063e-84	0.50235	0.721	0.654	4.56575e-80	mCherry
Raver2	2.39613e-84	0.62814	0.554	0.452	6.70917e-80	mCherry
Mertk	1.12401e-82	0.666904	0.559	0.46	3.14722e-78	mCherry
Igtp	1.90002e-79	1.64529	0.283	0.188	5.32005e-75	mCherry
Cdh13	9.50287e-79	1.47607	0.137	0.06	2.6608e-74	mCherry
Col9a2	2.82653e-77	0.875788	0.284	0.181	7.91429e-73	mCherry
Cthrc1	3.373e-76	0.848221	0.296	0.194	9.4444e-72	mCherry
Kctd14	5.13611e-76	0.667058	0.491	0.391	1.43811e-71	mCherry
Psmb8	9.50596e-76	0.733029	0.63	0.582	2.66167e-71	mCherry
Igf2	1.05352e-74	0.539668	0.47	0.353	2.94985e-70	mCherry
Col11a1	1.459e-74	1.28921	0.147	0.07	4.08521e-70	mCherry
Frzb	3.11885e-74	0.603926	0.549	0.471	8.73278e-70	mCherry
Kcnq5	1.98074e-70	1.48395	0.108	0.044	5.54607e-66	mCherry
Cd59a	3.49407e-69	0.562265	0.473	0.371	9.78339e-65	mCherry
Msmo1	5.03576e-69	0.590745	0.541	0.457	1.41001e-64	mCherry
Ttyh3	2.2623e-67	0.611785	0.481	0.389	6.33443e-63	mCherry
Antxr1	2.66378e-67	0.628163	0.475	0.379	7.45858e-63	mCherry
Lpar1	8.48753e-65	1.43208	0.112	0.049	2.37651e-60	mCherry
Slco1c1	1.89438e-64	0.929112	0.307	0.215	5.30427e-60	mCherry
Car5b	3.44073e-64	0.513824	0.498	0.404	9.63405e-60	mCherry
Tap2	1.39289e-63	0.646727	0.453	0.365	3.9001e-59	mCherry
Col2a1	2.9531e-62	0.629132	0.494	0.402	8.26867e-58	mCherry
Ephb1	3.32835e-62	0.655972	0.509	0.428	9.31937e-58	mCherry
H2-Q7	6.27775e-62	1.07834	0.222	0.142	1.75777e-57	mCherry
Kctd8	3.85744e-61	0.550632	0.63	0.554	1.08008e-56	mCherry
Slc16a1	1.30872e-59	0.562897	0.557	0.483	3.66442e-55	mCherry
Setd5	8.93116e-58	0.50619	0.692	0.636	2.50073e-53	mCherry
Sh3gl2	1.62283e-57	0.539413	0.698	0.638	4.54391e-53	mCherry
Rnaset2b	2.04155e-57	1.12591	0.13	0.065	5.71635e-53	mCherry
Cpxm1	2.22068e-56	0.652467	0.363	0.272	6.2179e-52	mCherry
Insig1	2.1678e-55	0.579875	0.453	0.368	6.06984e-51	mCherry
Ano1	1.2689e-54	1.35423	0.115	0.055	3.55293e-50	mCherry
Hif3a	3.5488e-54	0.606433	0.417	0.329	9.93664e-50	mCherry
Jakmip1	5.32757e-54	0.571164	0.425	0.336	1.49172e-49	mCherry
Sft2d1	6.10282e-54	0.703776	0.286	0.2	1.70879e-49	mCherry
9430041J12Rik	1.65122e-53	0.618172	0.388	0.298	4.62341e-49	mCherry
Chmp1a	2.12771e-53	0.585757	0.342	0.255	5.95758e-49	mCherry
Dapk1	1.04603e-52	0.626011	0.437	0.355	2.92888e-48	mCherry
Idi1	2.35533e-52	0.532305	0.47	0.391	6.59494e-48	mCherry
Arhgap32	2.83717e-52	0.510838	0.57	0.494	7.94408e-48	mCherry
Kcnip4	5.43713e-51	0.709278	0.434	0.659	1.5224e-46	mCherry
Lgals3	1.43377e-49	0.735389	0.244	0.166	4.01455e-45	mCherry
Psmb9	2.30204e-49	0.738967	0.453	0.389	6.44572e-45	mCherry
Grb14	3.24812e-49	1.04647	0.121	0.063	9.09473e-45	mCherry
Atp13a4	2.38189e-48	0.669369	0.28	0.202	6.6693e-44	mCherry
Uty	5.0587e-48	0.707894	0.282	0.195	1.41644e-43	mCherry
Atp2b4	1.53373e-47	0.898672	0.22	0.148	4.29444e-43	mCherry
Adamtsl1	2.15438e-47	0.541429	0.607	0.547	6.03226e-43	mCherry
Fmnl2	2.41851e-47	0.643657	0.458	0.385	6.77181e-43	mCherry
Chst9	6.444e-47	1.20266	0.145	0.084	1.80432e-42	mCherry
Maf	9.50577e-47	0.540926	0.417	0.337	2.66162e-42	mCherry
Calcrl	1.88392e-46	0.59424	0.399	0.319	5.27497e-42	mCherry
Tap1	5.69707e-46	1.06423	0.186	0.12	1.59518e-41	mCherry
St8sia1	6.30053e-46	0.736516	0.248	0.174	1.76415e-41	mCherry
Fam184b	8.85253e-46	0.611203	0.366	0.285	2.47871e-41	mCherry
Arhgef28	1.7811e-45	0.761918	0.246	0.172	4.98709e-41	mCherry
Irgm1	5.69013e-45	1.17687	0.316	0.245	1.59324e-40	mCherry
Lnx2	8.94751e-45	0.701209	0.277	0.201	2.5053e-40	mCherry
4930481A15Rik	3.98225e-44	0.805884	0.164	0.1	1.11503e-39	mCherry
Arhgap28	7.02645e-44	0.579939	0.414	0.337	1.96741e-39	mCherry
Flrt2	1.8115e-43	0.533257	0.514	0.444	5.07221e-39	mCherry
Aqp5	3.91931e-43	0.717698	0.234	0.16	1.09741e-38	mCherry
Deptor	5.15757e-43	0.500155	0.513	0.436	1.44412e-38	mCherry
Tff2	1.70222e-42	0.563132	0.487	0.419	4.76621e-38	mCherry
Trim12a	2.04454e-42	0.678229	0.231	0.162	5.72471e-38	mCherry
Cd274	2.90225e-42	1.59962	0.134	0.078	8.12631e-38	mCherry
Kctd1	1.53119e-41	0.509825	0.471	0.399	4.28732e-37	mCherry
Atp2b2	4.38585e-41	0.638825	0.296	0.224	1.22804e-36	mCherry
Cldn3	1.31711e-40	0.546968	0.376	0.3	3.68792e-36	mCherry
Slc8b1	1.36465e-40	0.670684	0.287	0.217	3.82102e-36	mCherry
Col22a1	3.32918e-40	1.06539	0.16	0.101	9.32169e-36	mCherry
Scn7a	3.40966e-40	0.660991	0.263	0.19	9.54703e-36	mCherry
Igfbp4	5.12624e-40	0.501611	0.449	0.377	1.43535e-35	mCherry
Lrig2	8.04755e-40	0.587979	0.371	0.298	2.25331e-35	mCherry
Hs3st5	1.70181e-39	0.657935	0.312	0.237	4.76508e-35	mCherry
Tle2	3.88257e-39	1.00414	0.13	0.076	1.08712e-34	mCherry
Trim30a	9.72641e-39	0.874412	0.144	0.089	2.7234e-34	mCherry
Clmn	1.33013e-38	0.809577	0.212	0.147	3.72435e-34	mCherry
1700063D05Rik	2.07971e-38	1.1525	0.109	0.06	5.8232e-34	mCherry
Caskin1	3.13016e-38	0.564088	0.346	0.273	8.76444e-34	mCherry
Grb10	7.03846e-38	0.519664	0.464	0.4	1.97077e-33	mCherry
Il20ra	7.6038e-38	0.853378	0.153	0.095	2.12907e-33	mCherry
Zbtb16	1.7434e-37	0.901501	0.17	0.111	4.88152e-33	mCherry
Lbh	2.46451e-37	0.651141	0.247	0.179	6.90062e-33	mCherry
Bmp5	1.33357e-36	0.554766	0.321	0.248	3.73399e-32	mCherry
Rnaset2a	1.52894e-36	0.552978	0.302	0.233	4.28103e-32	mCherry
Slco3a1	1.60237e-36	0.520903	0.382	0.311	4.48664e-32	mCherry
Rasgrp2	2.6857e-36	0.83091	0.184	0.125	7.51997e-32	mCherry
Nhs	3.34627e-36	0.647366	0.382	0.315	9.36955e-32	mCherry
Sh3pxd2b	6.67674e-36	0.512986	0.467	0.404	1.86949e-31	mCherry
Tpcn1	8.05995e-36	0.526963	0.396	0.33	2.25678e-31	mCherry
Dio1	8.45798e-34	0.602696	0.573	0.588	2.36823e-29	mCherry
Rab38	8.73814e-34	0.592525	0.217	0.154	2.44668e-29	mCherry
Pappa	1.6006e-33	0.81649	0.169	0.114	4.48167e-29	mCherry
Parm1	1.66382e-33	0.76662	0.181	0.124	4.65869e-29	mCherry
Sptssb	7.4255e-33	0.633033	0.222	0.161	2.07914e-28	mCherry
Rpl9-ps6	4.59622e-32	0.717382	0.157	0.103	1.28694e-27	mCherry
Rasa4	7.82188e-32	0.530502	0.38	0.317	2.19013e-27	mCherry
Cdk5rap1	3.121e-31	0.985968	0.113	0.068	8.73879e-27	mCherry
Rab6b	4.05003e-31	0.918596	0.112	0.067	1.13401e-26	mCherry
Alas1	5.20334e-31	0.535639	0.297	0.235	1.45693e-26	mCherry
Dcun1d4	1.64225e-30	0.680851	0.333	0.275	4.59829e-26	mCherry
Plppr4	4.43318e-30	0.638735	0.253	0.194	1.24129e-25	mCherry
Rai14	1.55799e-29	0.619841	0.292	0.232	4.36238e-25	mCherry
Il15	1.64889e-29	0.501362	0.351	0.287	4.61688e-25	mCherry
Ece1	1.01338e-28	0.640822	0.229	0.173	2.83747e-24	mCherry
H2-Ab1	2.75421e-28	0.682992	0.247	0.192	7.7118e-24	mCherry
A930015D03Rik	3.01925e-28	0.662419	0.182	0.13	8.45389e-24	mCherry
Filip1l	9.315e-28	0.736688	0.138	0.09	2.6082e-23	mCherry
Tmem184b	3.08049e-27	0.57886	0.251	0.196	8.62538e-23	mCherry
Traf5	3.54072e-26	0.728468	0.123	0.08	9.91401e-22	mCherry
Esrp1	5.27805e-26	0.638064	0.162	0.112	1.47785e-21	mCherry
Adrbk2	2.04833e-25	0.607948	0.277	0.222	5.73534e-21	mCherry
Nat8l	3.09763e-25	0.732279	0.14	0.095	8.67336e-21	mCherry
Tph2	3.63402e-25	0.898653	0.104	0.065	1.01753e-20	mCherry
1700066M21Rik	4.10798e-25	0.500607	0.254	0.2	1.15023e-20	mCherry
Tapbpl	7.90429e-25	0.711785	0.208	0.159	2.2132e-20	mCherry
Gbp2	2.2959e-24	1.28703	0.181	0.136	6.42852e-20	mCherry
Tmprss5	5.02461e-24	0.763795	0.119	0.078	1.40689e-19	mCherry
Khdrbs2	6.00652e-24	0.524274	0.33	0.275	1.68183e-19	mCherry
Gm15261	8.11865e-24	0.773197	0.114	0.074	2.27322e-19	mCherry
Gm6999	8.73056e-24	0.573366	0.31	0.258	2.44456e-19	mCherry
Lair1	1.01046e-23	0.864211	0.13	0.088	2.82928e-19	mCherry
Adamtsl5	6.70121e-23	0.600127	0.21	0.16	1.87634e-18	mCherry
Sqrdl	2.10116e-22	0.5982	0.167	0.123	5.88326e-18	mCherry
Sned1	2.7e-22	0.559447	0.337	0.289	7.55999e-18	mCherry
Adgrb2	5.18541e-22	0.658441	0.168	0.125	1.45191e-17	mCherry
Prrg1	7.18359e-22	0.729395	0.133	0.092	2.0114e-17	mCherry
Flrt1	9.002e-22	0.706402	0.135	0.095	2.52056e-17	mCherry
Pkdcc	2.16941e-21	0.586794	0.146	0.104	6.07435e-17	mCherry
Cables1	3.42782e-21	0.74273	0.149	0.107	9.5979e-17	mCherry
Chrm3	8.39203e-21	0.721273	0.165	0.122	2.34977e-16	mCherry
1700041G16Rik	1.01027e-20	0.598228	0.143	0.102	2.82876e-16	mCherry
Mafb	1.20582e-20	0.707908	0.134	0.094	3.37631e-16	mCherry
Mpped2	1.80077e-20	0.572378	0.206	0.16	5.04217e-16	mCherry
Tshz3	1.86039e-20	0.570506	0.21	0.164	5.20908e-16	mCherry
Dpp6	1.90481e-20	0.621288	0.35	0.307	5.33348e-16	mCherry
Tmem140	3.26696e-20	0.697575	0.129	0.09	9.14748e-16	mCherry
Nr1h4	8.90445e-20	0.568753	0.248	0.203	2.49325e-15	mCherry
Mmp16	1.96585e-19	0.562345	0.322	0.278	5.50437e-15	mCherry
Lrig3	2.24707e-19	0.541646	0.249	0.203	6.29181e-15	mCherry
Fads3	3.65569e-19	0.545816	0.211	0.166	1.02359e-14	mCherry
Psmb10	6.86873e-19	0.534602	0.355	0.314	1.92324e-14	mCherry
N4bp2	9.50895e-19	0.583892	0.248	0.203	2.66251e-14	mCherry
Shank2	3.44459e-18	0.656034	0.205	0.164	9.64485e-14	mCherry
Adora2b	5.13473e-18	0.545555	0.15	0.111	1.43772e-13	mCherry
Gm26724	7.81561e-18	0.660822	0.115	0.08	2.18837e-13	mCherry
Vax2os	2.79545e-17	0.506023	0.2	0.158	7.82726e-13	mCherry
Inpp4a	3.57386e-17	0.652856	0.136	0.1	1.00068e-12	mCherry
Arntl	5.27526e-17	0.591941	0.191	0.152	1.47707e-12	mCherry
Abca6	8.05251e-17	0.533619	0.258	0.215	2.2547e-12	mCherry
Lrp5	1.18811e-16	0.550888	0.184	0.146	3.3267e-12	mCherry
Taco1	1.53852e-16	0.609863	0.138	0.102	4.30785e-12	mCherry
2810454H06Rik	1.56951e-16	0.509421	0.129	0.093	4.39464e-12	mCherry
4921511C10Rik	3.04314e-16	0.688301	0.123	0.09	8.52079e-12	mCherry
Tpm3-rs7	9.19778e-16	0.539117	0.163	0.129	2.57538e-11	mCherry
Ebf4	1.0743e-15	0.664747	0.136	0.101	3.00804e-11	mCherry
Rapgef3	2.09966e-15	0.693035	0.12	0.088	5.87906e-11	mCherry
Mpp2	2.7249e-15	0.548427	0.165	0.129	7.62972e-11	mCherry
Nav3	3.83787e-15	0.635763	0.168	0.132	1.0746e-10	mCherry
Ppfia2	4.34545e-15	0.532077	0.268	0.228	1.21673e-10	mCherry
Btbd11	4.52126e-15	0.729481	0.123	0.092	1.26595e-10	mCherry
Atp11c	5.79469e-15	0.537568	0.276	0.238	1.62251e-10	mCherry
Raph1	7.72587e-15	0.587329	0.159	0.124	2.16324e-10	mCherry
Asap3	2.82664e-14	0.591575	0.142	0.109	7.9146e-10	mCherry
Epb41l4b	3.12798e-14	0.530933	0.201	0.163	8.75835e-10	mCherry
Fads2	7.75798e-14	0.50593	0.175	0.141	2.17223e-09	mCherry
Irgm2	2.10571e-13	0.893284	0.161	0.13	5.89598e-09	mCherry
Dpf3	3.17531e-13	0.507698	0.243	0.207	8.89088e-09	mCherry
Gfra2	3.31967e-13	0.531546	0.189	0.154	9.29506e-09	mCherry
Adcy5	5.34497e-13	0.603617	0.12	0.09	1.49659e-08	mCherry
Prdm11	1.13204e-12	0.615958	0.132	0.102	3.16971e-08	mCherry
Amy1	2.44759e-12	0.523804	0.258	0.223	6.85326e-08	mCherry
Col27a1	5.19576e-12	0.572412	0.179	0.147	1.45481e-07	mCherry
Slc44a5	5.70627e-12	0.643982	0.14	0.111	1.59776e-07	mCherry
Ablim3	1.7052e-11	0.669998	0.114	0.088	4.77457e-07	mCherry
H2-T23	2.69566e-11	0.557087	0.297	0.268	7.54786e-07	mCherry
Cap2	5.73347e-11	0.599878	0.105	0.08	1.60537e-06	mCherry
Sema4a	9.96177e-11	0.513374	0.167	0.138	2.7893e-06	mCherry
Abi3bp	1.07093e-10	0.507472	0.234	0.203	2.99859e-06	mCherry
Glis1	1.19177e-10	0.532916	0.127	0.099	3.33696e-06	mCherry
Gramd4	1.27649e-10	0.512655	0.155	0.127	3.57416e-06	mCherry
Aass	3.39697e-10	0.587483	0.121	0.096	9.51151e-06	mCherry
Ano6	8.0499e-10	0.50002	0.251	0.225	2.25397e-05	mCherry
Lrit3	3.57362e-09	0.562409	0.105	0.082	0.000100061	mCherry
Gbp7	4.03034e-09	0.613854	0.31	0.288	0.000112849	mCherry
Cep152	4.36435e-09	0.574626	0.131	0.106	0.000122202	mCherry
Catsper2	9.22324e-09	0.513244	0.105	0.083	0.000258251	mCherry
Rbm12b2	1.80757e-08	0.500973	0.11	0.088	0.00050612	mCherry
Gm11149	2.03242e-08	0.541997	0.113	0.091	0.000569077	mCherry
Fry	2.52294e-08	0.567856	0.131	0.108	0.000706422	mCherry
Gga3	6.47177e-08	0.519753	0.121	0.1	0.0018121	mCherry
Sv2b	6.99997e-08	0.535746	0.104	0.083	0.00195999	mCherry
Rimbp2	3.40546e-07	0.584744	0.108	0.089	0.00953529	mCherry
Sh3tc2	4.00315e-07	0.522024	0.108	0.088	0.0112088	mCherry
Tecpr2	7.08718e-07	0.51867	0.119	0.1	0.0198441	mCherry
Tll1	1.31065e-06	0.57079	0.13	0.111	0.0366983	mCherry
Pvrl1	2.35518e-06	0.501513	0.107	0.089	0.065945	mCherry
Fat3	1.61449e-05	0.520473	0.134	0.117	0.452057	mCherry
Ankrd27	5.42489e-05	0.509039	0.101	0.086	1	mCherry
Six5	9.13122e-05	0.510221	0.102	0.087	1	mCherry
Tenm4	0.00178172	0.507548	0.112	0.1	1	mCherry
Gm10076	0	2.28269	0.603	0.181	0	Oct4_mCherry
Mt2	0	2.09363	0.768	0.375	0	Oct4_mCherry
Syt1	0	1.49698	0.686	0.326	0	Oct4_mCherry
Mt3	0	1.73723	0.794	0.443	0	Oct4_mCherry
Gm10260	0	1.90345	0.49	0.162	0	Oct4_mCherry
Zfp36	0	1.49688	0.732	0.42	0	Oct4_mCherry
Nbl1	0	0.989649	0.812	0.526	0	Oct4_mCherry
Socs3	0	1.5132	0.526	0.263	0	Oct4_mCherry
Ccdc85b	0	1.1469	0.663	0.402	0	Oct4_mCherry
Gabrb1	0	6.18273	0.268	0.013	0	Oct4_mCherry
Atf3	0	1.81182	0.385	0.166	0	Oct4_mCherry
Nupr1	0	2.11669	0.589	0.378	0	Oct4_mCherry
Ephx1	0	1.99096	0.293	0.088	0	Oct4_mCherry
Car10	0	5.64154	0.208	0.009	0	Oct4_mCherry
Ptgds	0	0.904602	0.867	0.674	0	Oct4_mCherry
Rpl35	0	0.93958	0.904	0.722	0	Oct4_mCherry
Egr1	0	0.910506	0.926	0.758	0	Oct4_mCherry
Cntn5	0	3.60281	0.168	0.013	0	Oct4_mCherry
Hist2h2aa1	0	3.32848	0.167	0.018	0	Oct4_mCherry
Ier2	0	0.835775	0.943	0.797	0	Oct4_mCherry
Junb	0	1.17312	0.949	0.805	0	Oct4_mCherry
Shisa6	0	6.68284	0.145	0.004	0	Oct4_mCherry
Hmgn2	0	0.667509	0.878	0.738	0	Oct4_mCherry
Btg2	0	0.789621	0.934	0.796	0	Oct4_mCherry
Mt1	0	1.88846	0.975	0.839	0	Oct4_mCherry
Rplp2	0	0.558474	0.923	0.808	0	Oct4_mCherry
Rpl29	0	0.537802	0.934	0.821	0	Oct4_mCherry
mt-Atp8	0	0.54857	0.914	0.801	0	Oct4_mCherry
Stmn1	0	0.723004	0.956	0.846	0	Oct4_mCherry
Fos	0	0.852894	0.957	0.847	0	Oct4_mCherry
Rplp0	0	0.670639	0.956	0.854	0	Oct4_mCherry
Rplp1	0	0.549457	0.968	0.881	0	Oct4_mCherry
Jun	0	0.537745	0.957	0.884	0	Oct4_mCherry
E130218I03Rik	0	0.507111	0.975	0.916	0	Oct4_mCherry
mt-Nd4l	0	0.513049	0.976	0.919	0	Oct4_mCherry
Cst3	0	0.710673	0.975	0.92	0	Oct4_mCherry
Rpl41	0	0.550129	0.981	0.927	0	Oct4_mCherry
Ubc	0	0.760507	0.973	0.924	0	Oct4_mCherry
Crym	0	1.9776	0.988	0.94	0	Oct4_mCherry
mt-Nd1	0	0.690077	0.992	0.961	0	Oct4_mCherry
Gstp1	6.92742e-289	2.18975	0.227	0.054	1.93968e-284	Oct4_mCherry
Gt(ROSA)26Sor	4.13625e-275	1.44825	0.358	0.152	1.15815e-270	Oct4_mCherry
Gabrb3	1.40486e-264	2.17299	0.16	0.022	3.9336e-260	Oct4_mCherry
Klf6	2.21927e-255	0.992806	0.584	0.378	6.21395e-251	Oct4_mCherry
Fosb	1.52833e-250	0.52244	0.887	0.739	4.27932e-246	Oct4_mCherry
Ier3	3.39641e-249	1.44863	0.551	0.356	9.50994e-245	Oct4_mCherry
Gm30382	3.57424e-234	1.56431	0.25	0.083	1.00079e-229	Oct4_mCherry
Erdr1	7.26843e-234	0.535773	0.848	0.694	2.03516e-229	Oct4_mCherry
Vcl	1.00857e-233	0.847769	0.646	0.457	2.82399e-229	Oct4_mCherry
Ptx3	5.66063e-229	4.06421	0.126	0.014	1.58498e-224	Oct4_mCherry
Fxyd6	9.63693e-226	0.657028	0.816	0.662	2.69834e-221	Oct4_mCherry
Trpm1	1.05562e-225	1.77442	0.254	0.09	2.95574e-221	Oct4_mCherry
Aldh1a1	8.83594e-223	1.40797	0.47	0.285	2.47406e-218	Oct4_mCherry
Ppp2r2b	9.81202e-222	3.81594	0.117	0.011	2.74737e-217	Oct4_mCherry
Wee1	7.52506e-219	1.15231	0.439	0.244	2.10702e-214	Oct4_mCherry
Dusp1	1.33032e-218	0.722165	0.744	0.579	3.72489e-214	Oct4_mCherry
Ifitm2	8.75264e-215	1.6974	0.317	0.145	2.45074e-210	Oct4_mCherry
Cyr61	1.68598e-212	0.671058	0.762	0.595	4.72073e-208	Oct4_mCherry
Olfm2	2.80601e-212	0.608292	0.748	0.577	7.85683e-208	Oct4_mCherry
Hcn1	6.80241e-210	2.94956	0.119	0.014	1.90467e-205	Oct4_mCherry
Ccnd2	2.01222e-209	2.31718	0.221	0.075	5.63421e-205	Oct4_mCherry
Lamtor3	1.30241e-196	0.891545	0.44	0.243	3.64675e-192	Oct4_mCherry
Gm2115	2.91424e-186	1.15933	0.347	0.175	8.15988e-182	Oct4_mCherry
Camk2n1	6.56431e-186	0.558428	0.79	0.653	1.83801e-181	Oct4_mCherry
1600010M07Rik	1.75118e-185	0.996069	0.457	0.277	4.90331e-181	Oct4_mCherry
Gm11837	1.83895e-182	2.02242	0.175	0.051	5.14907e-178	Oct4_mCherry
Thbs3	3.39261e-182	1.37367	0.27	0.116	9.4993e-178	Oct4_mCherry
Kcnn2	8.88558e-178	1.46634	0.215	0.078	2.48796e-173	Oct4_mCherry
Cebpb	9.0793e-178	0.985764	0.522	0.348	2.5422e-173	Oct4_mCherry
A2m	6.90321e-176	2.36321	0.172	0.051	1.9329e-171	Oct4_mCherry
Neurog2	2.42315e-175	0.936845	0.465	0.279	6.78482e-171	Oct4_mCherry
Serping1	1.39428e-170	0.901437	0.453	0.279	3.90398e-166	Oct4_mCherry
Mgst1	2.49921e-166	0.67998	0.654	0.498	6.99779e-162	Oct4_mCherry
Nxph1	3.29304e-162	2.08146	0.145	0.038	9.22051e-158	Oct4_mCherry
Gfap	3.6219e-162	2.26542	0.179	0.06	1.01413e-157	Oct4_mCherry
Bhlhe40	3.43184e-160	0.671197	0.628	0.46	9.60915e-156	Oct4_mCherry
Etfa	1.39926e-157	0.708006	0.667	0.544	3.91794e-153	Oct4_mCherry
Gm26802	8.08167e-156	1.09246	0.303	0.153	2.26287e-151	Oct4_mCherry
Nop10	3.77648e-151	0.538343	0.694	0.543	1.05741e-146	Oct4_mCherry
Rab3b	8.00493e-149	1.54425	0.195	0.076	2.24138e-144	Oct4_mCherry
Pcp4	2.02837e-147	2.34765	0.111	0.023	5.67943e-143	Oct4_mCherry
Nkain3	6.95746e-147	2.07039	0.215	0.092	1.94809e-142	Oct4_mCherry
Tex11	8.67654e-146	1.32449	0.22	0.092	2.42943e-141	Oct4_mCherry
C1qtnf4	1.64513e-145	0.855138	0.421	0.263	4.60636e-141	Oct4_mCherry
1200007C13Rik	4.39627e-144	1.47256	0.225	0.098	1.23096e-139	Oct4_mCherry
Padi2	1.0598e-142	0.652148	0.577	0.42	2.96744e-138	Oct4_mCherry
Nfkbiz	7.96765e-142	0.51045	0.664	0.507	2.23094e-137	Oct4_mCherry
Pde1a	6.29504e-141	2.41826	0.139	0.041	1.76261e-136	Oct4_mCherry
Tmem159	2.53594e-140	1.21137	0.59	0.478	7.10063e-136	Oct4_mCherry
Igfbp5	4.0284e-140	4.26216	0.18	0.07	1.12795e-135	Oct4_mCherry
Rbp1	2.76844e-137	0.674095	0.87	0.814	7.75163e-133	Oct4_mCherry
Hddc3	1.21649e-134	0.826082	0.452	0.306	3.40617e-130	Oct4_mCherry
Emb	1.77947e-132	0.97243	0.404	0.256	4.9825e-128	Oct4_mCherry
Shroom3	3.23366e-132	0.905259	0.288	0.148	9.05424e-128	Oct4_mCherry
Txnip	4.78637e-132	0.802583	0.567	0.42	1.34018e-127	Oct4_mCherry
Adamts1	1.42163e-129	0.540968	0.711	0.586	3.98057e-125	Oct4_mCherry
S100a6	3.55516e-129	0.672312	0.851	0.754	9.95446e-125	Oct4_mCherry
Prr7	8.75799e-127	1.21942	0.252	0.124	2.45224e-122	Oct4_mCherry
Pde8b	7.36361e-125	1.35645	0.173	0.067	2.06181e-120	Oct4_mCherry
Gadd45b	1.35549e-124	1.16732	0.304	0.171	3.79537e-120	Oct4_mCherry
Cox6b2	1.75868e-119	0.709154	0.495	0.348	4.92429e-115	Oct4_mCherry
Tiparp	5.83123e-118	0.832668	0.43	0.289	1.63274e-113	Oct4_mCherry
Vit	3.19934e-116	1.08276	0.201	0.089	8.95816e-112	Oct4_mCherry
Gadd45g	3.19972e-116	0.511965	0.748	0.629	8.95922e-112	Oct4_mCherry
Lgals1	8.80525e-116	0.542198	0.673	0.544	2.46547e-111	Oct4_mCherry
Gpr37l1	1.19554e-113	1.7603	0.13	0.043	3.34753e-109	Oct4_mCherry
Uba52	1.03824e-111	0.70075	0.425	0.282	2.90708e-107	Oct4_mCherry
Pak1	3.1712e-110	1.00771	0.246	0.128	8.87935e-106	Oct4_mCherry
Piezo2	3.43537e-109	1.29168	0.186	0.082	9.61905e-105	Oct4_mCherry
Phlda3	9.88955e-109	1.25457	0.26	0.143	2.76907e-104	Oct4_mCherry
Odc1	1.0127e-108	0.644224	0.526	0.384	2.83557e-104	Oct4_mCherry
Srf	1.72348e-108	0.887752	0.29	0.165	4.82575e-104	Oct4_mCherry
Cib2	2.95508e-108	1.34892	0.36	0.242	8.27423e-104	Oct4_mCherry
C4b	1.90488e-106	1.26508	0.264	0.149	5.33366e-102	Oct4_mCherry
Sfxn1	3.85332e-106	1.21496	0.192	0.088	1.07893e-101	Oct4_mCherry
Nr4a1	3.12153e-105	1.62746	0.125	0.042	8.74029e-101	Oct4_mCherry
Dusp5	8.66814e-105	2.02659	0.11	0.033	2.42708e-100	Oct4_mCherry
Rps6ka1	5.50914e-99	1.44923	0.129	0.047	1.54256e-94	Oct4_mCherry
Tpm3	5.35247e-98	0.566954	0.503	0.367	1.49869e-93	Oct4_mCherry
Gas6	2.88294e-97	1.06054	0.221	0.115	8.07223e-93	Oct4_mCherry
Nrxn1	1.04948e-96	1.71838	0.119	0.041	2.93855e-92	Oct4_mCherry
Runx1t1	1.39763e-96	1.27793	0.165	0.072	3.91336e-92	Oct4_mCherry
Ifi30	1.24226e-95	0.621648	0.443	0.31	3.47834e-91	Oct4_mCherry
Cited1	3.7084e-95	0.923049	0.349	0.228	1.03835e-90	Oct4_mCherry
Fas	3.78991e-93	1.4599	0.151	0.065	1.06118e-88	Oct4_mCherry
Hmgb2	2.5453e-92	0.721111	0.368	0.241	7.12684e-88	Oct4_mCherry
Gap43	4.39058e-92	1.14739	0.19	0.094	1.22936e-87	Oct4_mCherry
Etv5	6.10037e-92	1.06687	0.201	0.101	1.7081e-87	Oct4_mCherry
Dock3	9.45819e-91	1.01367	0.261	0.151	2.64829e-86	Oct4_mCherry
Spidr	3.47572e-90	0.62157	0.395	0.268	9.73202e-86	Oct4_mCherry
Myb	1.70709e-89	0.736297	0.322	0.201	4.77985e-85	Oct4_mCherry
Cdkn1a	2.13203e-88	2.31773	0.105	0.036	5.9697e-84	Oct4_mCherry
Pdlim1	1.05371e-84	1.6975	0.107	0.039	2.95037e-80	Oct4_mCherry
Cited4	2.4643e-84	0.962698	0.382	0.266	6.90005e-80	Oct4_mCherry
Lsm7	3.5352e-84	0.71985	0.298	0.183	9.89856e-80	Oct4_mCherry
Prtn3	5.87915e-84	1.52691	0.102	0.035	1.64616e-79	Oct4_mCherry
Ptprk	1.60784e-83	1.33889	0.116	0.043	4.50196e-79	Oct4_mCherry
Fxyd3	2.98762e-81	0.691796	0.394	0.276	8.36534e-77	Oct4_mCherry
Gm14403	9.63432e-78	0.896776	0.217	0.121	2.69761e-73	Oct4_mCherry
Ppp1r15a	2.68991e-77	0.68391	0.429	0.316	7.53175e-73	Oct4_mCherry
Zfp593	3.6001e-76	0.872579	0.253	0.153	1.00803e-71	Oct4_mCherry
Maff	1.76153e-75	1.29491	0.147	0.07	4.93228e-71	Oct4_mCherry
D930015E06Rik	4.50066e-75	1.12406	0.12	0.049	1.26018e-70	Oct4_mCherry
Map3k14	6.13367e-75	0.529845	0.387	0.268	1.71743e-70	Oct4_mCherry
Gng3	9.60318e-75	1.66592	0.101	0.037	2.68889e-70	Oct4_mCherry
Nnat	2.63924e-74	2.27673	0.202	0.118	7.38988e-70	Oct4_mCherry
Tenm2	5.7336e-74	0.508018	0.363	0.247	1.60541e-69	Oct4_mCherry
Polr2l	6.09049e-74	0.749959	0.264	0.163	1.70534e-69	Oct4_mCherry
Tmem181a	6.46138e-73	0.821381	0.198	0.108	1.80919e-68	Oct4_mCherry
Dusp6	1.37568e-71	0.539056	0.525	0.418	3.85191e-67	Oct4_mCherry
Gm26532	1.43447e-70	0.770592	0.369	0.265	4.01651e-66	Oct4_mCherry
Pdlim3	2.07703e-70	0.624381	0.536	0.44	5.81567e-66	Oct4_mCherry
Neat1	2.6013e-70	0.674358	0.292	0.189	7.28363e-66	Oct4_mCherry
Zdhhc13	2.30736e-69	0.738093	0.235	0.141	6.46061e-65	Oct4_mCherry
Nfe2l2	4.67624e-69	0.501654	0.435	0.321	1.30935e-64	Oct4_mCherry
Hspb1	8.21784e-69	1.6013	0.12	0.053	2.301e-64	Oct4_mCherry
Pttg1	8.64161e-69	0.557177	0.496	0.407	2.41965e-64	Oct4_mCherry
2024-09-09	1.88732e-68	0.745496	0.257	0.159	5.28449e-64	Oct4_mCherry
1700112E06Rik	1.90976e-68	0.886641	0.16	0.081	5.34732e-64	Oct4_mCherry
Dpysl3	2.21215e-68	0.691284	0.246	0.149	6.19401e-64	Oct4_mCherry
Fjx1	3.37828e-68	1.41656	0.104	0.042	9.45918e-64	Oct4_mCherry
Pcsk1n	3.10661e-67	0.592862	0.363	0.254	8.6985e-63	Oct4_mCherry
Hk2	1.39763e-66	0.998821	0.148	0.073	3.91338e-62	Oct4_mCherry
Nes	3.96559e-66	1.21374	0.117	0.051	1.11036e-61	Oct4_mCherry
Grcc10	1.47578e-65	0.748613	0.224	0.134	4.13217e-61	Oct4_mCherry
Rarres2	2.82688e-65	0.580826	0.342	0.235	7.91526e-61	Oct4_mCherry
Ier5l	3.71552e-64	1.2754	0.126	0.059	1.04035e-59	Oct4_mCherry
Ifi27	4.97895e-64	0.534275	0.551	0.449	1.39411e-59	Oct4_mCherry
Dtx4	3.09683e-63	0.667084	0.223	0.133	8.67114e-59	Oct4_mCherry
Pim1	1.18955e-62	0.576764	0.342	0.241	3.33073e-58	Oct4_mCherry
Dnajb1	1.79377e-62	0.943871	0.298	0.206	5.02256e-58	Oct4_mCherry
Mrps6	9.04285e-62	0.575766	0.362	0.26	2.532e-57	Oct4_mCherry
Oasl2	4.59373e-61	0.555894	0.324	0.224	1.28624e-56	Oct4_mCherry
Nr2f2	1.21456e-58	0.635227	0.206	0.122	3.40076e-54	Oct4_mCherry
Rasd1	1.39174e-58	1.04442	0.189	0.111	3.89688e-54	Oct4_mCherry
Dcun1d3	2.85987e-57	0.760271	0.208	0.127	8.00764e-53	Oct4_mCherry
Rnf122	6.25051e-57	0.901099	0.149	0.08	1.75014e-52	Oct4_mCherry
Rho	9.59564e-57	0.779809	0.176	0.1	2.68678e-52	Oct4_mCherry
Fez1	1.45479e-56	0.562158	0.5	0.42	4.0734e-52	Oct4_mCherry
S100b	1.47546e-56	0.712951	0.288	0.197	4.13129e-52	Oct4_mCherry
Pgk1	1.8317e-56	0.62327	0.26	0.17	5.12875e-52	Oct4_mCherry
C1ql1	2.78265e-56	0.745931	0.268	0.18	7.79142e-52	Oct4_mCherry
2900052N01Rik	3.04172e-56	0.61425	0.352	0.255	8.51681e-52	Oct4_mCherry
Rabgef1	4.33446e-56	0.517833	0.371	0.272	1.21365e-51	Oct4_mCherry
Sct	5.07831e-56	1.02409	0.145	0.076	1.42193e-51	Oct4_mCherry
Gm10073	5.83333e-56	0.932816	0.143	0.075	1.63333e-51	Oct4_mCherry
Gpc3	1.4091e-55	0.722613	0.229	0.146	3.94549e-51	Oct4_mCherry
Sord	1.56845e-55	0.633761	0.244	0.158	4.39165e-51	Oct4_mCherry
Cacna2d3	2.2885e-52	0.970223	0.121	0.06	6.40779e-48	Oct4_mCherry
Plekha4	4.16853e-51	0.6827	0.162	0.092	1.16719e-46	Oct4_mCherry
Klf4	1.33136e-50	0.583289	0.287	0.2	3.72781e-46	Oct4_mCherry
Hmgb3	2.73223e-50	0.583172	0.25	0.165	7.65023e-46	Oct4_mCherry
Pdlim7	1.00225e-49	0.609961	0.266	0.182	2.80629e-45	Oct4_mCherry
Spry1	2.76934e-49	0.677373	0.263	0.181	7.75415e-45	Oct4_mCherry
Cxcl14	1.19428e-47	0.688842	0.205	0.13	3.34397e-43	Oct4_mCherry
Itpr1	9.1516e-47	0.554844	0.247	0.167	2.56245e-42	Oct4_mCherry
Gmpr	1.24158e-46	0.620629	0.244	0.164	3.47642e-42	Oct4_mCherry
Pdyn	1.61724e-46	1.09217	0.135	0.076	4.52826e-42	Oct4_mCherry
Pcbd1	2.60732e-46	0.63844	0.223	0.147	7.30049e-42	Oct4_mCherry
Ptprm	5.81827e-46	0.620265	0.219	0.143	1.62911e-41	Oct4_mCherry
Ntm	9.07549e-46	0.799528	0.118	0.062	2.54114e-41	Oct4_mCherry
Wfs1	1.96842e-45	0.507313	0.299	0.214	5.51156e-41	Oct4_mCherry
Klhl5	2.27212e-45	0.501028	0.219	0.142	6.36194e-41	Oct4_mCherry
Btg3	3.28256e-45	0.953799	0.115	0.06	9.19117e-41	Oct4_mCherry
Lin7a	9.47962e-45	0.755784	0.238	0.164	2.65429e-40	Oct4_mCherry
Tmem2	9.03646e-44	0.612536	0.171	0.104	2.53021e-39	Oct4_mCherry
C230035I16Rik	3.90056e-43	0.788556	0.134	0.076	1.09216e-38	Oct4_mCherry
Etnppl	4.50331e-43	0.531383	0.311	0.231	1.26093e-38	Oct4_mCherry
Gstt2	9.09216e-43	0.557354	0.242	0.165	2.5458e-38	Oct4_mCherry
Rabgap1l	9.89601e-43	0.542109	0.201	0.129	2.77088e-38	Oct4_mCherry
Unc80	7.46072e-42	0.826189	0.123	0.068	2.089e-37	Oct4_mCherry
Fuom	1.3634e-41	0.541162	0.217	0.144	3.81753e-37	Oct4_mCherry
Paqr8	3.94639e-41	0.774031	0.117	0.063	1.10499e-36	Oct4_mCherry
Cox7a1	2.16425e-40	0.819333	0.125	0.071	6.05991e-36	Oct4_mCherry
Gm8186	1.2074e-39	0.934402	0.101	0.053	3.38072e-35	Oct4_mCherry
Cmtm7	1.32725e-39	0.542489	0.199	0.13	3.7163e-35	Oct4_mCherry
Dmxl2	3.39775e-39	0.538185	0.201	0.132	9.51371e-35	Oct4_mCherry
Klf2	4.87204e-39	1.1847	0.115	0.065	1.36417e-34	Oct4_mCherry
Myh9	3.83809e-38	0.526302	0.199	0.132	1.07467e-33	Oct4_mCherry
Lrp8	1.27442e-37	0.544903	0.29	0.217	3.56837e-33	Oct4_mCherry
Tomm6	1.33391e-37	0.652067	0.156	0.096	3.73496e-33	Oct4_mCherry
Mylip	2.11769e-37	0.691444	0.142	0.086	5.92952e-33	Oct4_mCherry
Plat	2.88939e-37	0.557525	0.227	0.157	8.09028e-33	Oct4_mCherry
Srm	1.13582e-36	0.537901	0.264	0.191	3.1803e-32	Oct4_mCherry
Rab11fip1	1.62367e-36	0.665144	0.142	0.086	4.54626e-32	Oct4_mCherry
Veph1	2.38432e-36	0.698416	0.114	0.064	6.67609e-32	Oct4_mCherry
Gm14420	3.02696e-36	0.607433	0.178	0.116	8.47549e-32	Oct4_mCherry
Aen	4.56294e-36	0.602263	0.198	0.134	1.27762e-31	Oct4_mCherry
Irs2	5.53065e-35	0.854273	0.116	0.067	1.54858e-30	Oct4_mCherry
Lcmt2	1.66348e-34	0.754442	0.136	0.084	4.65774e-30	Oct4_mCherry
Rab31	2.00975e-34	0.605509	0.14	0.086	5.62731e-30	Oct4_mCherry
Klf10	5.92561e-34	0.745655	0.122	0.072	1.65917e-29	Oct4_mCherry
Nol10	6.10348e-33	0.526888	0.157	0.101	1.70897e-28	Oct4_mCherry
Gm14410	1.866e-32	0.580827	0.127	0.077	5.22479e-28	Oct4_mCherry
Tuba4a	2.61576e-32	0.60756	0.166	0.111	7.32412e-28	Oct4_mCherry
Dnph1	3.01583e-32	0.559434	0.168	0.111	8.44434e-28	Oct4_mCherry
Gm15886	6.94851e-32	0.835071	0.101	0.058	1.94558e-27	Oct4_mCherry
Igdcc4	1.45203e-31	0.596529	0.136	0.084	4.06569e-27	Oct4_mCherry
Plscr2	2.29397e-30	0.669695	0.136	0.087	6.4231e-26	Oct4_mCherry
Irf7	2.99168e-30	0.56667	0.183	0.126	8.37672e-26	Oct4_mCherry
Cfh	1.21109e-29	0.642054	0.207	0.148	3.39106e-25	Oct4_mCherry
Mafk	2.53032e-29	0.747923	0.104	0.061	7.08489e-25	Oct4_mCherry
Slc43a2	3.21839e-29	0.703646	0.1	0.058	9.01148e-25	Oct4_mCherry
Ttr	4.29183e-29	1.09468	0.111	0.067	1.20171e-24	Oct4_mCherry
Fndc5	4.82334e-28	0.594939	0.156	0.105	1.35053e-23	Oct4_mCherry
Tspan17	1.1537e-27	0.610711	0.123	0.077	3.23037e-23	Oct4_mCherry
Pde6g	8.68558e-27	0.670421	0.119	0.076	2.43196e-22	Oct4_mCherry
Tuba1c	9.58249e-27	0.988578	0.145	0.1	2.6831e-22	Oct4_mCherry
Mef2c	1.69932e-26	0.541293	0.142	0.094	4.75809e-22	Oct4_mCherry
Gpam	3.00396e-26	0.573035	0.126	0.081	8.41109e-22	Oct4_mCherry
Eya2	5.08939e-26	0.708712	0.1	0.06	1.42503e-21	Oct4_mCherry
Rims2	1.73571e-24	0.540364	0.125	0.082	4.86e-20	Oct4_mCherry
Tgif2	6.33031e-24	0.512864	0.113	0.071	1.77249e-19	Oct4_mCherry
Abcb1b	1.19792e-23	0.587022	0.101	0.063	3.35418e-19	Oct4_mCherry
Hmga1	6.68134e-23	0.609088	0.102	0.064	1.87078e-18	Oct4_mCherry
Cd200	7.04555e-23	0.575912	0.122	0.081	1.97275e-18	Oct4_mCherry
Siah2	1.03408e-21	0.509328	0.145	0.102	2.89543e-17	Oct4_mCherry
Fabp3	1.0509e-21	0.602181	0.133	0.091	2.94251e-17	Oct4_mCherry
Upk3bl	1.71832e-21	0.601543	0.111	0.073	4.8113e-17	Oct4_mCherry
1010001B22Rik	2.19659e-21	0.541492	0.109	0.071	6.15046e-17	Oct4_mCherry
9430020K01Rik	3.08253e-21	0.518566	0.139	0.097	8.63109e-17	Oct4_mCherry
Sag	3.77291e-21	0.682075	0.139	0.097	1.05641e-16	Oct4_mCherry
Gm16006	1.21008e-20	0.57583	0.109	0.072	3.38823e-16	Oct4_mCherry
Ifitm3	5.05547e-20	0.760398	0.425	0.388	1.41553e-15	Oct4_mCherry
Gngt1	5.38485e-19	0.514537	0.15	0.109	1.50776e-14	Oct4_mCherry
Tmem59l	1.10363e-18	0.621018	0.102	0.069	3.09016e-14	Oct4_mCherry
Bdnf	1.31019e-18	0.504406	0.123	0.085	3.66854e-14	Oct4_mCherry
Tnfrsf12a	3.76367e-13	0.6557	0.102	0.074	1.05383e-08	Oct4_mCherry

## Sheet: DEGS in MGPC
gene	p_val	avg_log2FC	mCherry	Oct_4	p_val_adj	cluster
Sfxn5	3.85109e-32	0.818949	0.964	0.863	1.07831e-27	mCherry
mCherryCW3SL	1.79708e-27	3.51936	0.397	0.097	5.03183e-23	mCherry
Gm8730	1.32087e-17	0.655225	0.896	0.602	3.69842e-13	mCherry
Camk1d	1.20495e-16	0.983569	0.687	0.445	3.37387e-12	mCherry
Eno1b	2.45402e-15	1.03993	0.543	0.318	6.87125e-11	mCherry
Add3	1.23209e-14	0.65335	0.833	0.744	3.44986e-10	mCherry
Sntg1	2.61337e-14	1.79871	0.324	0.119	7.31744e-10	mCherry
Dio1	7.57479e-13	0.885954	0.715	0.535	2.12094e-08	mCherry
Gm10709	7.50674e-12	3.87362	0.144	0.017	2.10189e-07	mCherry
PISD	6.85416e-11	0.683595	0.64	0.453	1.91917e-06	mCherry
Gas1	4.44325e-10	0.702685	0.809	0.662	1.24411e-05	mCherry
Psmb9	5.23558e-10	1.48609	0.323	0.159	1.46596e-05	mCherry
Tubb2b	6.50147e-10	0.646765	0.658	0.475	1.82041e-05	mCherry
Ddx3y	8.89957e-10	0.858101	0.363	0.169	2.49188e-05	mCherry
Fbxo2	3.46077e-09	0.6409	0.716	0.545	9.69015e-05	mCherry
Uty	4.85568e-09	0.961425	0.335	0.159	0.000135959	mCherry
Hexb	5.21795e-09	0.741323	0.556	0.403	0.000146102	mCherry
Kctd14	6.43588e-09	0.692374	0.63	0.458	0.000180205	mCherry
Tsc22d1	9.52381e-09	0.52264	0.799	0.672	0.000266667	mCherry
Trim30a	1.22849e-08	2.92053	0.109	0.015	0.000343978	mCherry
Wnk2	1.58757e-08	0.654592	0.63	0.468	0.00044452	mCherry
Sbspon	2.06727e-08	0.500024	0.828	0.721	0.000578836	mCherry
Kcnk1	2.88384e-08	0.505382	0.697	0.542	0.000807475	mCherry
Gm10093	2.88646e-08	2.63571	0.11	0.017	0.000808207	mCherry
Gm30524	3.2324e-08	0.607681	0.692	0.562	0.000905072	mCherry
Hmx1	3.57062e-08	0.502937	0.759	0.602	0.000999774	mCherry
Kctd8	7.21154e-08	0.617874	0.598	0.448	0.00201923	mCherry
Rims1	1.01603e-07	0.711825	0.478	0.323	0.00284487	mCherry
Dpp6	1.69365e-07	0.721475	0.549	0.391	0.00474223	mCherry
Igf2	2.6634e-07	1.00087	0.276	0.142	0.00745753	mCherry
Stat1	3.85707e-07	1.06758	0.37	0.244	0.0107998	mCherry
Sostdc1	4.17338e-07	0.84569	0.334	0.194	0.0116855	mCherry
Enpp2	4.87448e-07	0.563083	0.569	0.41	0.0136485	mCherry
Cxadr	5.4654e-07	0.81645	0.353	0.211	0.0153031	mCherry
1190007I07Rik	7.09991e-07	0.878612	0.378	0.236	0.0198797	mCherry
Arhgap6	7.22286e-07	0.97443	0.337	0.197	0.020224	mCherry
Psmb8	7.28765e-07	1.04917	0.452	0.341	0.0204054	mCherry
Gm9843	9.70194e-07	0.815154	0.342	0.201	0.0271654	mCherry
Eif2s3y	1.99527e-06	0.663393	0.381	0.226	0.0558676	mCherry
Chrm3	2.14265e-06	0.689296	0.357	0.214	0.0599943	mCherry
Traf5	3.49878e-06	1.32974	0.154	0.057	0.0979658	mCherry
Gm2000	3.68972e-06	0.908094	0.326	0.206	0.103312	mCherry
Polr3h	4.72444e-06	0.563346	0.491	0.366	0.132284	mCherry
Tsc22d3	5.04267e-06	0.742542	0.334	0.209	0.141195	mCherry
1700123O20Rik	6.68443e-06	0.536277	0.571	0.46	0.187164	mCherry
Il33	7.53444e-06	0.728494	0.494	0.388	0.210964	mCherry
Tapbpl	7.63532e-06	1.68949	0.128	0.045	0.213789	mCherry
3110056K07Rik	8.11868e-06	0.612857	0.438	0.306	0.227323	mCherry
Tcf3	8.58917e-06	0.564891	0.532	0.393	0.240497	mCherry
Bmp5	1.1057e-05	0.872695	0.248	0.134	0.309597	mCherry
Foxp2	1.35801e-05	1.12234	0.149	0.06	0.380242	mCherry
Apitd1	1.42925e-05	1.58047	0.104	0.03	0.400189	mCherry
Bloc1s1	1.70337e-05	0.840301	0.285	0.169	0.476944	mCherry
Rpl9-ps6	2.08168e-05	1.05474	0.214	0.114	0.582872	mCherry
Gbp2	2.31171e-05	1.80027	0.1	0.03	0.647279	mCherry
Chmp1a	3.54854e-05	0.643937	0.391	0.274	0.993592	mCherry
Ak4	3.76347e-05	0.647536	0.386	0.259	1	mCherry
Pde7b	3.93797e-05	0.573343	0.381	0.254	1	mCherry
Lnx2	4.14154e-05	0.941895	0.214	0.114	1	mCherry
Prune2	5.13062e-05	0.636864	0.476	0.361	1	mCherry
Folh1	5.22846e-05	0.677428	0.412	0.303	1	mCherry
Cacng4	5.38825e-05	0.581748	0.46	0.336	1	mCherry
Mpst	5.58063e-05	0.644831	0.321	0.204	1	mCherry
Zbtb12	5.81616e-05	0.781954	0.232	0.129	1	mCherry
Ablim1	5.92694e-05	0.58835	0.491	0.386	1	mCherry
Pepd	6.35665e-05	0.502335	0.499	0.396	1	mCherry
Ntrk2	7.40667e-05	1.18385	0.123	0.05	1	mCherry
Mkl2	7.64791e-05	0.573441	0.352	0.239	1	mCherry
Rnaset2a	9.46197e-05	0.682207	0.345	0.239	1	mCherry
Rab6b	0.000103195	1.13389	0.18	0.095	1	mCherry
Gm8797	0.000109897	1.29745	0.136	0.062	1	mCherry
Cpeb2	0.000110369	0.72209	0.266	0.164	1	mCherry
Pappa	0.000111164	0.862469	0.135	0.057	1	mCherry
2810403A07Rik	0.000114849	0.575768	0.326	0.216	1	mCherry
Snx25	0.000130645	0.593266	0.316	0.211	1	mCherry
Antxr1	0.000155094	0.751739	0.329	0.226	1	mCherry
Aard	0.000155384	0.955983	0.248	0.154	1	mCherry
Qpct	0.000178665	1.60986	0.104	0.04	1	mCherry
H2-Ab1	0.000192593	0.758812	0.245	0.152	1	mCherry
Colgalt2	0.000233144	0.900923	0.207	0.119	1	mCherry
Fubp3	0.000238495	0.640024	0.347	0.251	1	mCherry
Col9a2	0.000244522	0.642172	0.277	0.177	1	mCherry
Trim12a	0.000253136	0.993372	0.199	0.117	1	mCherry
Gm13152	0.000270461	0.630146	0.293	0.189	1	mCherry
Mpp6	0.000274568	0.532889	0.538	0.453	1	mCherry
9630001P10Rik	0.000276896	1.04176	0.149	0.075	1	mCherry
Inpp4b	0.000328508	0.512389	0.504	0.386	1	mCherry
Rps27rt	0.000339511	0.722774	0.271	0.179	1	mCherry
Nek1	0.000420624	0.759157	0.274	0.182	1	mCherry
4933417O13Rik	0.000504484	0.954074	0.118	0.052	1	mCherry
Snap23	0.000549456	0.574701	0.34	0.241	1	mCherry
2610035D17Rik	0.000661204	0.567902	0.426	0.336	1	mCherry
Dync1i1	0.000667714	1.11494	0.151	0.08	1	mCherry
Lpcat2	0.000689151	1.11545	0.146	0.077	1	mCherry
Tpst2	0.000704552	0.518038	0.405	0.323	1	mCherry
Cpne2	0.000704846	0.65725	0.183	0.104	1	mCherry
Nde1	0.000783883	0.533206	0.254	0.164	1	mCherry
Kazald1	0.000800026	0.894764	0.185	0.109	1	mCherry
Met	0.000834772	1.24745	0.112	0.052	1	mCherry
RP24-127M20.8	0.00086264	0.543476	0.266	0.174	1	mCherry
Zbtb16	0.000888848	1.05963	0.162	0.092	1	mCherry
Lrig3	0.000890641	0.829045	0.224	0.142	1	mCherry
Gm9725	0.000907418	0.890227	0.118	0.055	1	mCherry
Selenbp1	0.000915909	0.679994	0.246	0.159	1	mCherry
Adamts6	0.0010414	0.623273	0.203	0.122	1	mCherry
Dym	0.00108574	0.746803	0.206	0.129	1	mCherry
Hnmt	0.00110278	0.598922	0.263	0.174	1	mCherry
Kcnip3	0.00117685	0.654248	0.264	0.174	1	mCherry
Klhdc4	0.0011905	0.824508	0.207	0.132	1	mCherry
Ift88	0.0012342	1.15256	0.123	0.062	1	mCherry
Acot11	0.00125854	0.557964	0.272	0.187	1	mCherry
St8sia1	0.00136739	1.28212	0.102	0.047	1	mCherry
Gm5900	0.00140535	0.698919	0.293	0.219	1	mCherry
Pmvk	0.00140667	0.509696	0.303	0.211	1	mCherry
Agbl3	0.00149509	0.829574	0.199	0.124	1	mCherry
Bcs1l	0.00149717	0.819657	0.154	0.085	1	mCherry
2610305D13Rik	0.00167021	0.680434	0.188	0.112	1	mCherry
Wdr82	0.00170344	0.544208	0.295	0.211	1	mCherry
N4bp2	0.00192573	0.551139	0.229	0.149	1	mCherry
Fut10	0.00194685	0.925654	0.136	0.075	1	mCherry
Sumf2	0.00206331	0.676164	0.211	0.134	1	mCherry
Taf1a	0.00208753	0.959271	0.138	0.077	1	mCherry
Prkag1	0.00218162	0.53051	0.326	0.246	1	mCherry
Gng11	0.00225197	0.525207	0.37	0.281	1	mCherry
Sigmar1	0.0022595	0.502513	0.347	0.256	1	mCherry
Parm1	0.00234972	0.819515	0.143	0.08	1	mCherry
Ehd1	0.00276527	0.65175	0.206	0.134	1	mCherry
Taco1	0.00293235	0.683792	0.167	0.102	1	mCherry
BC051226	0.00296114	0.884067	0.125	0.067	1	mCherry
Ccdc191	0.00319943	0.912419	0.182	0.117	1	mCherry
Ormdl1	0.0032026	0.584579	0.295	0.221	1	mCherry
Bst2	0.00326579	0.680953	0.284	0.204	1	mCherry
Klhl22	0.00327645	0.603091	0.24	0.167	1	mCherry
Oaf	0.00331499	0.591908	0.267	0.184	1	mCherry
4930481A15Rik	0.00336244	0.678685	0.149	0.087	1	mCherry
Jdp2	0.00347586	0.557303	0.347	0.266	1	mCherry
Sptssb	0.00358491	1.09492	0.115	0.062	1	mCherry
Mtm1	0.00359567	0.776965	0.207	0.139	1	mCherry
Irgm1	0.0036262	0.873503	0.266	0.199	1	mCherry
Igfbp4	0.00364027	0.703892	0.162	0.097	1	mCherry
Trim9	0.00370389	0.545238	0.335	0.259	1	mCherry
Nsg1	0.00383955	0.727524	0.117	0.062	1	mCherry
Gm10941	0.004009	0.582894	0.198	0.129	1	mCherry
Trim32	0.00403823	0.656734	0.219	0.149	1	mCherry
Alas1	0.00409329	0.554264	0.305	0.231	1	mCherry
Abca6	0.00426198	0.706276	0.194	0.129	1	mCherry
Slc8b1	0.00428642	0.775535	0.125	0.07	1	mCherry
Cbfb	0.00433265	0.718127	0.198	0.129	1	mCherry
Mxra8	0.00444881	0.648257	0.209	0.142	1	mCherry
Rfc3	0.00475539	0.649391	0.248	0.182	1	mCherry
Zfp874a	0.00476913	0.792723	0.135	0.077	1	mCherry
Glis1	0.00516448	0.568897	0.167	0.104	1	mCherry
Uba7	0.00518654	0.649445	0.147	0.087	1	mCherry
Astn2	0.0052416	0.554556	0.182	0.114	1	mCherry
Phf13	0.00554801	0.880036	0.112	0.062	1	mCherry
Acad9	0.0055692	0.512696	0.227	0.157	1	mCherry
Sned1	0.00571278	0.585746	0.19	0.124	1	mCherry
Gm26512	0.00584877	0.66529	0.19	0.122	1	mCherry
Col15a1	0.00598154	0.860631	0.19	0.124	1	mCherry
Ift81	0.0061035	0.577428	0.227	0.162	1	mCherry
Arhgef19	0.00615304	0.526821	0.227	0.154	1	mCherry
Tceb3	0.00620777	0.580245	0.282	0.216	1	mCherry
Tbc1d16	0.00627849	0.646012	0.211	0.147	1	mCherry
Rad1	0.00638938	0.578784	0.193	0.129	1	mCherry
Igtp	0.00639671	0.914038	0.135	0.08	1	mCherry
Il15	0.00647841	0.678289	0.156	0.095	1	mCherry
Dhcr24	0.0065408	0.680129	0.156	0.097	1	mCherry
Nhlrc1	0.00655553	0.5978	0.151	0.092	1	mCherry
Pgm1	0.00670613	0.676105	0.198	0.137	1	mCherry
Msantd4	0.00691031	0.519461	0.292	0.219	1	mCherry
Mvd	0.00699164	0.606107	0.164	0.104	1	mCherry
Fam13a	0.00722791	0.643808	0.143	0.085	1	mCherry
Ethe1	0.00742009	0.803642	0.138	0.085	1	mCherry
Hscb	0.00744515	0.68677	0.173	0.114	1	mCherry
Fdps	0.00752772	0.511223	0.293	0.219	1	mCherry
Cds2	0.0076332	0.572673	0.209	0.147	1	mCherry
Blvra	0.00775812	0.60853	0.201	0.137	1	mCherry
Plekhf2	0.00806268	0.510958	0.23	0.164	1	mCherry
Dus2	0.00815937	0.651396	0.194	0.134	1	mCherry
Fam177a	0.00819494	0.634086	0.17	0.112	1	mCherry
Rictor	0.00827881	0.529314	0.335	0.274	1	mCherry
Cpxm1	0.00836124	0.777691	0.186	0.129	1	mCherry
Lrrc75b	0.0083623	0.599688	0.16	0.1	1	mCherry
Ispd	0.00853679	0.586148	0.191	0.132	1	mCherry
A930015D03Rik	0.00881813	0.519113	0.193	0.129	1	mCherry
Srbd1	0.00882391	0.558552	0.199	0.137	1	mCherry
Tbccd1	0.00901609	0.655573	0.146	0.09	1	mCherry
Tmprss5	0.00908917	0.786401	0.144	0.09	1	mCherry
Psmb10	0.00934757	0.563599	0.251	0.184	1	mCherry
Bbs4	0.00937029	0.651226	0.204	0.144	1	mCherry
Slc25a19	0.00951895	0.713101	0.138	0.085	1	mCherry
Pipox	0.00958284	0.534264	0.233	0.169	1	mCherry
Lama5	0.00973058	0.571733	0.186	0.129	1	mCherry
Slco1c1	0.00995158	0.74772	0.135	0.082	1	mCherry
Kcnip4	1.12104e-78	3.23826	0.644	0.096	3.13891e-74	Oct4_mCherry
Gm10076	9.21257e-48	2.00961	0.667	0.261	2.57952e-43	Oct4_mCherry
Mt1	3.65391e-37	1.91605	0.896	0.7	1.0231e-32	Oct4_mCherry
Fos	1.22825e-35	0.770052	0.983	0.966	3.4391e-31	Oct4_mCherry
mt-Nd1	2.23009e-33	0.626156	0.985	0.99	6.24425e-29	Oct4_mCherry
Gm10260	1.72952e-32	1.51959	0.657	0.334	4.84266e-28	Oct4_mCherry
Xist	3.4481e-32	1.38901	0.639	0.261	9.65468e-28	Oct4_mCherry
Junb	4.04726e-32	0.950424	0.975	0.922	1.13323e-27	Oct4_mCherry
Btg2	1.95965e-29	0.79697	0.983	0.961	5.48703e-25	Oct4_mCherry
Egr1	3.60596e-29	0.77921	0.973	0.906	1.00967e-24	Oct4_mCherry
Rpl35	3.68406e-25	0.680715	0.963	0.898	1.03154e-20	Oct4_mCherry
Erdr1	2.11128e-24	0.868985	0.91	0.77	5.91158e-20	Oct4_mCherry
Dusp1	2.57945e-24	1.19209	0.756	0.506	7.22246e-20	Oct4_mCherry
Gabrb1	5.47929e-23	4.22357	0.189	0.015	1.5342e-18	Oct4_mCherry
Zfp36	7.13988e-23	1.51475	0.614	0.34	1.99917e-18	Oct4_mCherry
Mt2	2.38534e-22	1.76196	0.575	0.323	6.67896e-18	Oct4_mCherry
Stmn1	7.47268e-22	0.660215	0.988	0.951	2.09235e-17	Oct4_mCherry
Ier2	2.39175e-21	0.590473	0.985	0.955	6.6969e-17	Oct4_mCherry
Socs3	1.23586e-20	1.7449	0.5	0.24	3.46041e-16	Oct4_mCherry
Ubc	1.2076e-19	0.701245	0.993	0.974	3.38128e-15	Oct4_mCherry
Cntn5	1.48187e-18	3.8072	0.152	0.011	4.14922e-14	Oct4_mCherry
Car10	5.59438e-16	3.85675	0.127	0.008	1.56643e-11	Oct4_mCherry
Gabrb3	5.73151e-16	1.9271	0.162	0.023	1.60482e-11	Oct4_mCherry
Dll3	1.4996e-15	2.37466	0.239	0.068	4.19887e-11	Oct4_mCherry
Syt1	4.04784e-15	1.50876	0.333	0.131	1.1334e-10	Oct4_mCherry
Pkib	1.10252e-14	2.95962	0.179	0.037	3.08707e-10	Oct4_mCherry
Hist1h2ap	2.06792e-14	3.85823	0.119	0.01	5.79018e-10	Oct4_mCherry
Mt3	3.8804e-14	1.60293	0.433	0.235	1.08651e-09	Oct4_mCherry
Hcn1	7.42145e-14	3.01823	0.132	0.016	2.078e-09	Oct4_mCherry
Ptgds	7.84751e-14	0.618855	0.938	0.84	2.1973e-09	Oct4_mCherry
Hist2h2aa1	2.10408e-13	2.74251	0.149	0.026	5.89143e-09	Oct4_mCherry
mt-Atp8	3.62566e-13	0.567532	0.881	0.809	1.01518e-08	Oct4_mCherry
Crym	4.75786e-13	1.44799	0.918	0.904	1.3322e-08	Oct4_mCherry
Prmt8	7.6021e-13	2.01218	0.211	0.063	2.12859e-08	Oct4_mCherry
Nupr1	1.31325e-12	1.79267	0.326	0.143	3.67709e-08	Oct4_mCherry
Ptx3	3.24234e-12	3.73869	0.127	0.019	9.07854e-08	Oct4_mCherry
Dusp5	6.49063e-12	2.16337	0.211	0.07	1.81738e-07	Oct4_mCherry
Gstp1	1.13917e-11	1.66734	0.219	0.073	3.18969e-07	Oct4_mCherry
Atf3	1.27356e-11	1.46143	0.403	0.22	3.56596e-07	Oct4_mCherry
Neurog2	1.97817e-11	0.923916	0.858	0.78	5.53887e-07	Oct4_mCherry
Nrxn3	2.00586e-11	0.625764	0.963	0.929	5.6164e-07	Oct4_mCherry
Otx2	4.39867e-11	2.42834	0.162	0.042	1.23163e-06	Oct4_mCherry
Gm30382	6.4155e-11	2.5701	0.114	0.018	1.79634e-06	Oct4_mCherry
Zfp385b	8.32954e-11	3.01481	0.102	0.013	2.33227e-06	Oct4_mCherry
Pcp4	8.56288e-11	2.66772	0.109	0.016	2.39761e-06	Oct4_mCherry
Ifitm2	8.96124e-11	1.45767	0.254	0.102	2.50915e-06	Oct4_mCherry
Olfm2	2.53047e-10	0.610337	0.803	0.715	7.0853e-06	Oct4_mCherry
Arc	4.54631e-10	3.60934	0.119	0.024	1.27297e-05	Oct4_mCherry
Mybl1	1.62966e-09	1.72016	0.328	0.183	4.56305e-05	Oct4_mCherry
Maff	3.71872e-09	2.57673	0.124	0.031	0.000104124	Oct4_mCherry
Serping1	5.43526e-09	0.579289	0.701	0.558	0.000152187	Oct4_mCherry
Gt(ROSA)26Sor	8.65485e-09	1.45182	0.229	0.102	0.000242336	Oct4_mCherry
Kcnn2	1.11656e-08	1.43552	0.224	0.096	0.000312638	Oct4_mCherry
Ccdc85b	1.28219e-08	0.87084	0.517	0.376	0.000359014	Oct4_mCherry
Trpm1	1.55187e-08	1.69802	0.177	0.065	0.000434525	Oct4_mCherry
Padi2	2.28073e-08	0.643132	0.572	0.4	0.000638604	Oct4_mCherry
Trnp1	3.52176e-08	1.93324	0.127	0.036	0.000986093	Oct4_mCherry
Gng13	3.52548e-08	2.24628	0.1	0.021	0.000987134	Oct4_mCherry
Mycl	5.07442e-08	0.989	0.333	0.186	0.00142084	Oct4_mCherry
Uchl1	7.56104e-08	1.3878	0.194	0.081	0.00211709	Oct4_mCherry
Wee1	1.13336e-07	0.903768	0.41	0.256	0.00317342	Oct4_mCherry
Rhob	1.22112e-07	0.67782	0.617	0.48	0.00341913	Oct4_mCherry
Myb	3.98769e-07	0.959238	0.308	0.175	0.0111655	Oct4_mCherry
3110035E14Rik	4.43565e-07	1.54553	0.194	0.088	0.0124198	Oct4_mCherry
Mcl1	4.76264e-07	0.563019	0.659	0.541	0.0133354	Oct4_mCherry
Rgs16	5.45661e-07	0.650181	0.821	0.789	0.0152785	Oct4_mCherry
Lrp8	5.83746e-07	0.837167	0.371	0.232	0.0163449	Oct4_mCherry
Thbs3	5.9848e-07	1.31509	0.197	0.089	0.0167575	Oct4_mCherry
Hist1h1c	8.37852e-07	1.67255	0.244	0.131	0.0234598	Oct4_mCherry
1200007C13Rik	8.69865e-07	3.21294	0.104	0.031	0.0243562	Oct4_mCherry
Gm26802	1.16853e-06	1.07065	0.256	0.138	0.0327187	Oct4_mCherry
Srf	1.37529e-06	0.758497	0.371	0.235	0.0385082	Oct4_mCherry
Rho	1.37712e-06	1.08174	0.184	0.083	0.0385594	Oct4_mCherry
Lsm7	3.05623e-06	0.759167	0.371	0.243	0.0855744	Oct4_mCherry
Hist1h2bc	3.23415e-06	0.684804	0.853	0.904	0.0905562	Oct4_mCherry
Shroom3	3.3142e-06	1.2757	0.139	0.055	0.0927977	Oct4_mCherry
Cacna2d1	3.42039e-06	0.770725	0.483	0.355	0.095771	Oct4_mCherry
Mylip	3.72288e-06	1.16642	0.179	0.083	0.104241	Oct4_mCherry
Prr7	5.32593e-06	0.920047	0.338	0.216	0.149126	Oct4_mCherry
Dlg2	5.37038e-06	0.938931	0.396	0.271	0.150371	Oct4_mCherry
1810041L15Rik	6.10526e-06	0.837632	0.363	0.241	0.170947	Oct4_mCherry
Ntsr2	6.53152e-06	1.11563	0.177	0.083	0.182883	Oct4_mCherry
Ier5l	7.54321e-06	1.4333	0.114	0.041	0.21121	Oct4_mCherry
Tmsb10	7.72597e-06	0.575359	0.662	0.564	0.216327	Oct4_mCherry
Nr4a1	7.89234e-06	1.3634	0.169	0.079	0.220985	Oct4_mCherry
Shf	8.62415e-06	0.823675	0.316	0.194	0.241476	Oct4_mCherry
Fam53b	9.72672e-06	1.57284	0.117	0.044	0.272348	Oct4_mCherry
Gm10073	1.04223e-05	0.855135	0.199	0.097	0.291823	Oct4_mCherry
Necab3	1.07791e-05	1.0466	0.177	0.084	0.301814	Oct4_mCherry
Gfra2	1.09511e-05	1.6199	0.127	0.05	0.30663	Oct4_mCherry
Gm2115	1.23773e-05	1.47316	0.114	0.042	0.346564	Oct4_mCherry
Rbp1	1.39475e-05	0.592837	0.803	0.81	0.39053	Oct4_mCherry
9330182L06Rik	1.49617e-05	1.31345	0.117	0.044	0.418926	Oct4_mCherry
Wfs1	1.56681e-05	0.735202	0.294	0.173	0.438708	Oct4_mCherry
Etv5	1.68525e-05	1.59915	0.1	0.034	0.47187	Oct4_mCherry
Neat1	1.76073e-05	0.997339	0.271	0.164	0.493003	Oct4_mCherry
Map3k14	1.89658e-05	0.730025	0.388	0.267	0.531041	Oct4_mCherry
Prelp	2.06025e-05	1.12142	0.259	0.16	0.57687	Oct4_mCherry
Susd6	2.54038e-05	0.540854	0.547	0.441	0.711305	Oct4_mCherry
Tuba4a	2.54271e-05	0.92075	0.234	0.133	0.711959	Oct4_mCherry
Insm1	2.70593e-05	0.831883	0.356	0.241	0.757659	Oct4_mCherry
Nnat	3.04827e-05	1.28552	0.204	0.113	0.853515	Oct4_mCherry
Cplx2	3.27943e-05	0.679914	0.488	0.381	0.918242	Oct4_mCherry
Rnf122	3.76629e-05	1.05362	0.224	0.128	1	Oct4_mCherry
Neurod1	4.02298e-05	1.18438	0.119	0.05	1	Oct4_mCherry
Siah2	4.2711e-05	0.886445	0.204	0.112	1	Oct4_mCherry
Gm6483	4.92491e-05	0.512046	0.48	0.374	1	Oct4_mCherry
Hes1	5.171e-05	0.95182	0.323	0.222	1	Oct4_mCherry
Wwc1	5.23398e-05	1.02565	0.159	0.076	1	Oct4_mCherry
A2m	7.15417e-05	1.94778	0.201	0.115	1	Oct4_mCherry
Cacna2d3	7.57697e-05	1.2694	0.117	0.05	1	Oct4_mCherry
Nfkbiz	9.15195e-05	0.776376	0.423	0.327	1	Oct4_mCherry
Hmga1	9.43444e-05	0.791851	0.226	0.131	1	Oct4_mCherry
Ddit3	9.52736e-05	0.940698	0.458	0.382	1	Oct4_mCherry
Pcsk1n	0.000101476	0.634806	0.383	0.269	1	Oct4_mCherry
Bhlhe22	0.000104217	1.63725	0.184	0.104	1	Oct4_mCherry
Larp1b	0.000105355	0.829464	0.206	0.117	1	Oct4_mCherry
Klf2	0.000116806	1.68749	0.139	0.07	1	Oct4_mCherry
Abcb9	0.000121506	0.508212	0.5	0.376	1	Oct4_mCherry
Sapcd1	0.00012237	0.869281	0.291	0.188	1	Oct4_mCherry
St8sia5	0.00012311	0.723319	0.311	0.207	1	Oct4_mCherry
Gm5611	0.000134863	0.801204	0.206	0.118	1	Oct4_mCherry
Rom1	0.000136671	0.677659	0.279	0.175	1	Oct4_mCherry
Gng3	0.000147736	0.752538	0.147	0.073	1	Oct4_mCherry
Tspan17	0.000149421	1.18244	0.154	0.079	1	Oct4_mCherry
Neurod4	0.000150127	1.25379	0.119	0.053	1	Oct4_mCherry
Lynx1	0.000166992	0.947712	0.284	0.194	1	Oct4_mCherry
Apba2	0.0001733	0.598809	0.55	0.465	1	Oct4_mCherry
Ephx1	0.000189625	1.17297	0.114	0.05	1	Oct4_mCherry
Nes	0.000192817	1.11355	0.152	0.079	1	Oct4_mCherry
Vcl	0.000195191	0.764163	0.485	0.402	1	Oct4_mCherry
Rps6ka2	0.000195648	0.813154	0.276	0.185	1	Oct4_mCherry
Slc25a42	0.000215868	1.21472	0.114	0.052	1	Oct4_mCherry
Gadd45b	0.000219366	0.887375	0.241	0.152	1	Oct4_mCherry
Fam159b	0.000236835	0.714183	0.43	0.331	1	Oct4_mCherry
Aldh1a1	0.000244001	1.17076	0.264	0.175	1	Oct4_mCherry
Ciart	0.0002604	0.733396	0.351	0.254	1	Oct4_mCherry
Cdk6	0.000284256	0.675543	0.386	0.293	1	Oct4_mCherry
Mfng	0.000309689	0.873481	0.229	0.143	1	Oct4_mCherry
1600010M07Rik	0.000313073	0.589576	0.425	0.324	1	Oct4_mCherry
Abcg1	0.000320955	0.851536	0.211	0.128	1	Oct4_mCherry
Gfap	0.000321663	1.01217	0.214	0.131	1	Oct4_mCherry
Srm	0.000343925	0.517722	0.438	0.331	1	Oct4_mCherry
Vps11	0.000355962	0.799307	0.194	0.112	1	Oct4_mCherry
Nxph1	0.000378084	1.6358	0.1	0.044	1	Oct4_mCherry
Piezo2	0.000378972	0.859813	0.234	0.149	1	Oct4_mCherry
Clic4	0.00042309	0.534106	0.393	0.293	1	Oct4_mCherry
Tiparp	0.000425542	0.592156	0.405	0.306	1	Oct4_mCherry
C530008M17Rik	0.000515633	0.584626	0.256	0.165	1	Oct4_mCherry
Ocel1	0.000520325	0.633093	0.299	0.207	1	Oct4_mCherry
Egfl7	0.000524584	0.935247	0.124	0.062	1	Oct4_mCherry
Pgk1	0.00054652	0.648952	0.246	0.156	1	Oct4_mCherry
Adgrb3	0.000589945	0.565959	0.192	0.113	1	Oct4_mCherry
Rabgef1	0.000598773	0.587024	0.331	0.24	1	Oct4_mCherry
Ccnd2	0.000600362	0.701109	0.316	0.227	1	Oct4_mCherry
Klf6	0.00062705	0.550149	0.493	0.407	1	Oct4_mCherry
Trim17	0.000635514	1.12042	0.164	0.094	1	Oct4_mCherry
Zfp593	0.000677372	0.590013	0.44	0.347	1	Oct4_mCherry
Fxyd3	0.000681283	0.600968	0.408	0.311	1	Oct4_mCherry
Dock3	0.000696952	0.891266	0.241	0.16	1	Oct4_mCherry
Snap25	0.000722317	0.740834	0.107	0.05	1	Oct4_mCherry
E130309D02Rik	0.000729592	0.952063	0.132	0.068	1	Oct4_mCherry
Scfd2	0.000768558	0.948451	0.162	0.092	1	Oct4_mCherry
Tmem181a	0.000833335	0.603274	0.236	0.152	1	Oct4_mCherry
Sgpl1	0.000839397	0.692959	0.211	0.13	1	Oct4_mCherry
Cox6b2	0.000868731	0.736753	0.261	0.173	1	Oct4_mCherry
Nudt8	0.00088324	0.821631	0.201	0.125	1	Oct4_mCherry
Id1	0.000952893	0.589272	0.724	0.712	1	Oct4_mCherry
Iffo2	0.000960878	0.6464	0.251	0.169	1	Oct4_mCherry
Bmper	0.00100604	1.15029	0.129	0.07	1	Oct4_mCherry
Cib2	0.00106156	0.759383	0.211	0.133	1	Oct4_mCherry
Tmem219	0.00110961	0.539711	0.301	0.207	1	Oct4_mCherry
Gm11837	0.00117052	0.8069	0.149	0.083	1	Oct4_mCherry
Anapc15	0.00154428	0.696164	0.236	0.159	1	Oct4_mCherry
Ccdc9	0.00160641	0.705376	0.211	0.136	1	Oct4_mCherry
Slc9a9	0.00161369	0.593993	0.286	0.198	1	Oct4_mCherry
Rel	0.00162239	1.12084	0.1	0.049	1	Oct4_mCherry
Dnajb1	0.00167408	1.09134	0.299	0.224	1	Oct4_mCherry
Lmna	0.00188478	0.68138	0.358	0.277	1	Oct4_mCherry
Map1b	0.00193572	0.660537	0.149	0.084	1	Oct4_mCherry
Rfx2	0.0020268	0.869873	0.119	0.063	1	Oct4_mCherry
Cebpb	0.00205455	0.913243	0.331	0.251	1	Oct4_mCherry
Spty2d1	0.00231584	0.629696	0.301	0.217	1	Oct4_mCherry
Zak	0.00242924	0.980542	0.119	0.065	1	Oct4_mCherry
Dpy19l1	0.00248385	0.804059	0.114	0.06	1	Oct4_mCherry
B930036N10Rik	0.00253454	1.1386	0.124	0.07	1	Oct4_mCherry
Hey2	0.00305232	0.540698	0.373	0.295	1	Oct4_mCherry
Abtb2	0.00308039	0.71125	0.119	0.065	1	Oct4_mCherry
Dusp15	0.00314962	0.589739	0.159	0.096	1	Oct4_mCherry
Cdc25b	0.00346727	0.651811	0.321	0.25	1	Oct4_mCherry
Hmgb2	0.00353894	0.661031	0.41	0.324	1	Oct4_mCherry
Ptprk	0.00365569	0.826825	0.152	0.092	1	Oct4_mCherry
Specc1	0.00375025	0.59314	0.224	0.154	1	Oct4_mCherry
Runx1t1	0.00397397	0.686555	0.149	0.091	1	Oct4_mCherry
Pip4k2c	0.00421582	0.631189	0.214	0.146	1	Oct4_mCherry
Gpr37l1	0.00485958	1.25626	0.119	0.07	1	Oct4_mCherry
Frmpd1	0.00493093	0.575559	0.197	0.13	1	Oct4_mCherry
Drd4	0.00493809	0.656639	0.139	0.083	1	Oct4_mCherry
Porcn	0.00522381	0.510262	0.241	0.165	1	Oct4_mCherry
Ankrd13a	0.0053085	0.563491	0.244	0.169	1	Oct4_mCherry
Btg3	0.00556347	0.69842	0.167	0.107	1	Oct4_mCherry
Ccdc85c	0.00561062	0.708965	0.154	0.096	1	Oct4_mCherry
Slc12a2	0.00575351	0.51634	0.274	0.203	1	Oct4_mCherry
Iah1	0.00585034	0.555208	0.216	0.147	1	Oct4_mCherry
Tesc	0.00592418	0.963691	0.122	0.071	1	Oct4_mCherry
Pramef8	0.00616762	0.814723	0.159	0.102	1	Oct4_mCherry
Traf6	0.00644182	0.580305	0.264	0.19	1	Oct4_mCherry
Sema3b	0.00646228	0.900189	0.109	0.062	1	Oct4_mCherry
Hk2	0.00648489	0.794604	0.119	0.07	1	Oct4_mCherry
Hist1h4h	0.00687366	0.86802	0.122	0.071	1	Oct4_mCherry
Iars2	0.00699994	0.525125	0.279	0.204	1	Oct4_mCherry
Ptprm	0.00704749	0.704036	0.137	0.084	1	Oct4_mCherry
Grpel2	0.00728727	0.533614	0.201	0.136	1	Oct4_mCherry
Gtpbp1	0.00733433	0.512539	0.172	0.11	1	Oct4_mCherry
Gzf1	0.00786965	0.62374	0.216	0.152	1	Oct4_mCherry
Myh9	0.00792293	0.593671	0.214	0.149	1	Oct4_mCherry
Rab27b	0.00794647	0.931577	0.221	0.157	1	Oct4_mCherry
Ier3	0.00800643	1.02564	0.229	0.169	1	Oct4_mCherry
Klc3	0.0081807	1.03772	0.104	0.06	1	Oct4_mCherry
Pknox2	0.00828641	0.850674	0.119	0.071	1	Oct4_mCherry
Rps6ka1	0.00830218	0.769268	0.104	0.058	1	Oct4_mCherry
Rnf19b	0.00843658	0.677956	0.124	0.075	1	Oct4_mCherry
Mob1a	0.00852291	0.563558	0.201	0.136	1	Oct4_mCherry
Tex11	0.0085456	0.776238	0.114	0.066	1	Oct4_mCherry
Msrb3	0.00869413	0.545755	0.286	0.219	1	Oct4_mCherry
Rdh5	0.00869652	0.959209	0.1	0.057	1	Oct4_mCherry
Mvp	0.00891552	0.599082	0.201	0.143	1	Oct4_mCherry
2900052N01Rik	0.00893213	0.983899	0.102	0.058	1	Oct4_mCherry
Tbcd	0.00954209	0.533623	0.162	0.105	1	Oct4_mCherry
Taf4b	0.00967943	0.853305	0.102	0.058	1	Oct4_mCherry
Ythdc2	0.00977257	0.569631	0.201	0.141	1	Oct4_mCherry
Pcdhgc3	0.00996637	0.87265	0.107	0.063	1	Oct4_mCherry
