# Supplementary material for: Viral-mediated Pou5f1 (Oct4) overexpression and inhibition of Notch signaling synergistically induce neurogenic competence in mammalian Müller glia
Source: eLife. 2025 May 19;14:RP106450. doi: 10.7554/eLife.106450 (PMC12088672; doi:10.7554/eLife.106450)
Supplement: Supplementary file 6. — Columns identify the AAV construct, titer, and injection volume. [file elife-106450-supp6.xlsx]

## Sheet: Sheet1
AAV Constructs	Titre (gc/ml)	Injection volume (μl)
GFAP-mCherry	1.96E^13	2μl/eye
GFAP-Oct4-P2A-mCherry	2.58E^13	2μl/eye
Table ST5: List of AAV constructs used in the study. Columns identify the AAV construct, titre, and injection volume.
